# Supplementary material for: High energy explosive with low sensitivity: a new energetic cocrystal based on CL-20 and BMDNP
Source: Royal Society of Chemistry journal article supplement (doi:10.1039/d3ce01118f), 2023-12-26
Supplement: d3ce01118f1.pdf [file d3ce01118f1.pdf]

Electronic Supplementary Material (ESI) for CrystEngComm

## Supporting Information

### High Energy Explosive with Low Sensitivity: A New Energetic Cocrystal Based on CL-20 and BMDNP

Suming Jing\*<sup>[a]</sup>, Jiahao Deng<sup>[a]</sup>, Cong Li<sup>[a]</sup>, Jin Zhu<sup>[a]</sup>, Yucun Liu<sup>[a]</sup>, Yuanyuan Wang<sup>[a]</sup>, Wei Zhang<sup>[b]</sup>, Jia Liu<sup>[c]</sup>

<sup>a</sup> College of Environmental and Safety Engineering, North University of China, Taiyuan 030051, China.

<sup>b</sup> Shanxi Jiangyang Chemical Plant.

<sup>c</sup> Hubei Sanjiang Aerospace Jianghe Chemical Technology Co, Ltd.

## Contents

### SI 1. Single Crystal X-ray Diffraction (SXRD)

### SI 2. Hirshfeld Surface and Interactions

### SI 3. Detonation property evaluation

### SI 4. References

### SI 1. Single Crystal X-ray Diffraction (SXRD)

The single crystal X-ray diffraction data of the cocrystal were collected using a Rigaku XtaLAB-Synergy-S diffractometer in Japan with Cu-K $\alpha$  radiation ( $\lambda = 1.54184 \text{ \AA}$ ). During data collection, the crystal was kept at 298 K. Data were processed using Olex2 software. The data were solved and optimised using SHELXL. The single crystal structure and optimized structure is shown in Figure S1, S2, and the bond lengths, bond angles, and optimized coordinates of the cocrystal are shown in Table 1,2,3. Information about hydrogen bonding is shown in Table 4.

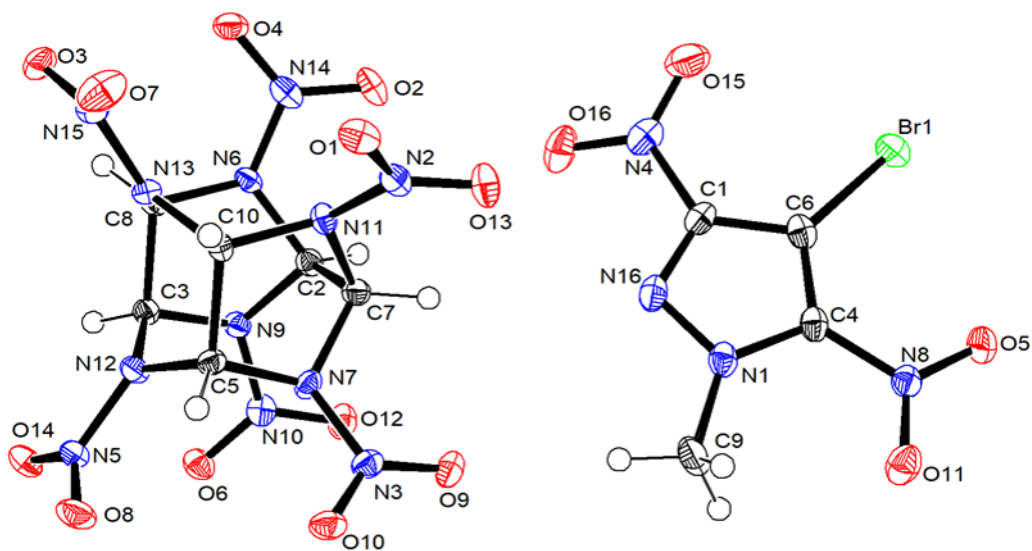

**Figure. S1** Ortep diagram for the CL-20/BMDNP cocrystal with 50% probability ellipsoids.

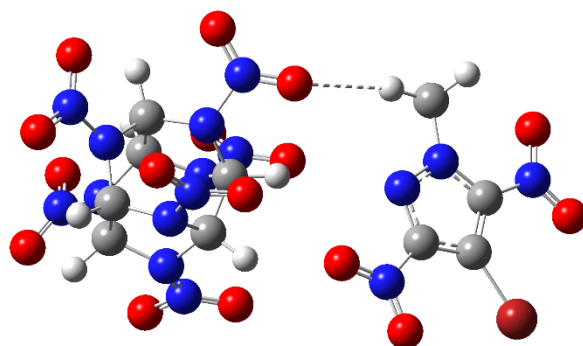

**Figure. S2** Optimized structure by Gaussian 09 software.

**Table 1.** Bond lengths(Å) for Cl-20/BMDNP cocrystal.

| Bond    | Bond lengths | Bond    | Bond lengths |
|---------|--------------|---------|--------------|
| Br1-C6  | 1.861(4)     | O13-N2  | 1.216(4)     |
| O5-N8   | 1.222(4)     | O14-N5  | 1.210(4)     |
| O11-N8  | 1.230(4)     | N2-N11  | 1.415(4)     |
| O15-N4  | 1.227(5)     | N3-N7   | 1.411(4)     |
| O16-N4  | 1.222(4)     | N5-N12  | 1.400(4)     |
| N1-N16  | 1.327(4)     | N6-N14  | 1.361(4)     |
| N1-C4   | 1.359(5)     | N6-C2   | 1.456(5)     |
| N1-C9   | 1.457(5)     | N6-C8   | 1.473(4)     |
| N4-C1   | 1.449(5)     | N7-C5   | 1.469(4)     |
| N8-C4   | 1.448(5)     | N7-C7   | 1.465(5)     |
| N16-C1  | 1.315(5)     | N9-N10  | 1.371(4)     |
| C1-C6   | 1.399(5)     | N9-C2   | 1.449(4)     |
| C4-C6   | 1.369(6)     | N9-C3   | 1.478(4)     |
| O1-N2   | 1.216(4)     | N11-C7  | 1.458(5)     |
| O2-N14  | 1.231(4)     | N11-C10 | 1.473(4)     |
| O3-N15  | 1.217(4)     | N12-C3  | 1.433(4)     |
| O4-N14  | 1.223(4)     | N12-C5  | 1.453(4)     |
| O6-N10  | 1.222(4)     | N13-N15 | 1.401(4)     |
| O7-N15  | 1.214(4)     | N13-C8  | 1.438(4)     |
| O8-N5   | 1.229(4)     | N13-C10 | 1.438(4)     |
| O9-N3   | 1.222(4)     | C2-C7   | 1.596(5)     |
| O10-N3  | 1.211(4)     | C3-C8   | 1.574(5)     |
| O12-N10 | 1.229(4)     | C5-C10  | 1.569(5)     |

**Table 2.** Bond angles (°) for Cl-20/BMDNP cocrystal.

| Bond       | Bond angles | Bond        | Bond angles |
|------------|-------------|-------------|-------------|
| N16-N1-C4  | 110.7(3)    | O6-N10-O12  | 127.2(3)    |
| N16-N1-C9  | 118.5(3)    | O6-N10-N9   | 116.4(3)    |
| C4-N1-C9   | 130.8(3)    | O12-N10-N9  | 116.4(3)    |
| O15-N4-C1  | 117.9(3)    | N2-N11-C7   | 119.1(3)    |
| O16-N4-O15 | 124.4(4)    | N2-N11-C10  | 118.2(3)    |
| O16-N4-C1  | 117.7(3)    | C7-N11-C10  | 108.6(3)    |
| O5-N8-O11  | 125.3(3)    | N5-N12-C3   | 119.7(3)    |
| O5-N8-C4   | 116.7(3)    | N5-N12-C5   | 119.1(3)    |
| O11-N8-C4  | 118.0(3)    | C3-N12-C5   | 117.8(3)    |
| C1-N16-N1  | 105.3(3)    | N15-N13-C8  | 120.4(3)    |
| N16-C1-N4  | 118.5(3)    | N15-N13-C10 | 119.6(2)    |
| N16-C1-C6  | 113.1(3)    | C8-N13-C10  | 117.4(3)    |
| C6-C1-N4   | 128.4(3)    | O2-N14-N6   | 116.5(3)    |
| N1-C4-N8   | 122.3(3)    | O4-N14-O2   | 126.8(3)    |
| N1-C4-C6   | 108.6(3)    | O4-N14-N6   | 116.7(3)    |
| C6-C4-N8   | 129.1(3)    | O3-N15-N13  | 116.4(3)    |
| C1-C6-Br1  | 128.3(3)    | O7-N15-O3   | 127.3(3)    |
| C4-C6-Br1  | 129.3(3)    | O7-N15-N13  | 116.3(3)    |
| C4-C6-C1   | 102.2(3)    | N6-C2-C7    | 112.3(3)    |
| O1-N2-N11  | 115.8(3)    | N9-C2-N6    | 95.1(2)     |
| O13-N2-O1  | 127.6(3)    | N9-C2-C7    | 113.6(3)    |
| O13-N2-N11 | 116.4(3)    | N9-C3-C8    | 101.0(3)    |
| O9-N3-N7   | 115.1(3)    | N12-C3-N9   | 113.6(3)    |
| O10-N3-O9  | 127.4(3)    | N12-C3-C8   | 108.1(3)    |
| O10-N3-N7  | 117.2(3)    | N7-C5-C10   | 104.4(3)    |
| O8-N5-N12  | 116.3(3)    | N12-C5-N7   | 109.6(3)    |
| O14-N5-O8  | 126.8(3)    | N12-C5-C10  | 108.2(3)    |
| O14-N5-N12 | 116.9(3)    | N7-C7-C2    | 107.0(3)    |
| N14-N6-C2  | 119.8(3)    | N11-C7-N7   | 104.0(3)    |
| N14-N6-C8  | 120.4(3)    | N11-C7-C2   | 107.5(3)    |
| C2-N6-C8   | 111.8(3)    | N6-C8-C3    | 101.2(2)    |
| N3-N7-C5   | 118.2(3)    | N13-C8-N6   | 112.2(2)    |
| N3-N7-C7   | 119.0(3)    | N13-C8-C3   | 108.9(3)    |
| C7-N7-C5   | 108.8(3)    | N11-C10-C5  | 104.4(3)    |
| N10-N9-C2  | 119.3(3)    | N13-C10-N11 | 110.7(3)    |
| N10-N9-C3  | 119.9(3)    | N13-C10-C5  | 108.6(3)    |
| C2-N9-C3   | 111.7(3)    |             |             |

**Table 3.** Fractional Atomic Coordinates ( $\text{\AA}\times 10^4$ ) for CL-20/BMDNP cocrystal.

| Atom | x          | y         | z        | Atom | x       | y       | z        |
|------|------------|-----------|----------|------|---------|---------|----------|
| Br1  | 10924.3(4) | 2738.4(3) | 544.9(3) | O12  | 9031(3) | 4967(2) | 8693(3)  |
| O5   | 12461(3)   | 4951(2)   | 232(3)   | O13  | 5850(3) | 4786(3) | 3455(3)  |
| O11  | 11962(3)   | 6497(2)   | 1191(3)  | O14  | 5101(3) | 6594(2) | 10786(2) |
| O15  | 8300(3)    | 2107(3)   | 2150(3)  | N2   | 4809(3) | 5024(2) | 4050(3)  |
| O16  | 8017(3)    | 2873(3)   | 4083(3)  | N3   | 7331(3) | 6950(3) | 6384(3)  |
| N1   | 10104(3)   | 5425(3)   | 2741(3)  | N5   | 4994(3) | 6879(3) | 9605(3)  |
| N4   | 8502(3)    | 2856(3)   | 2982(3)  | N6   | 5285(3) | 3500(2) | 7434(3)  |
| N8   | 11818(3)   | 5500(3)   | 1010(3)  | N7   | 6509(3) | 6087(2) | 6873(3)  |
| N16  | 9219(3)    | 4726(3)   | 3272(3)  | N9   | 6700(3) | 4554(2) | 8728(3)  |
| C1   | 9357(4)    | 3792(3)   | 2629(3)  | N10  | 7933(3) | 5098(3) | 9273(3)  |
| C4   | 10804(4)   | 4922(3)   | 1772(3)  | N11  | 5014(3) | 4935(2) | 5488(3)  |
| C6   | 10336(4)   | 3854(3)   | 1650(3)  | N12  | 4926(3) | 6045(2) | 8623(3)  |
| C9   | 10173(4)   | 6554(3)   | 3235(4)  | N13  | 3300(3) | 4809(2) | 7132(3)  |
| O1   | 3580(3)    | 5259(2)   | 3552(3)  | N14  | 4828(3) | 2757(3) | 6446(2)  |
| O2   | 5730(3)    | 2479(2)   | 5684(2)  | N15  | 1836(3) | 4521(2) | 6765(3)  |
| O3   | 1330(3)    | 3832(2)   | 7473(3)  | C2   | 6639(4) | 4103(3) | 7366(3)  |
| O4   | 3579(3)    | 2414(2)   | 6430(2)  | C3   | 5249(3) | 4933(3) | 9035(3)  |
| O6   | 7828(3)    | 5640(2)   | 10299(2) | C5   | 5033(3) | 6334(3) | 7211(3)  |
| O7   | 1204(3)    | 5006(3)   | 5797(3)  | C7   | 6488(4) | 5015(3) | 6196(3)  |
| O8   | 4903(3)    | 7827(2)   | 9172(2)  | C8   | 4214(4) | 4151(3) | 8093(3)  |
| O9   | 8469(3)    | 6669(2)   | 5959(2)  | C10  | 4012(4) | 5543(3) | 6277(3)  |
| O10  | 6899(2)    | 7879(2)   | 6524(2)  |      |         |         |          |

**Table 4.** Bond lengths( $\text{\AA}$ ) and bond angles ( $^\circ$ ) of hydrogen bonds.

| Interaction | Bond lengths | Bond angles |
|-------------|--------------|-------------|
| C9-H9A-O3   | 2.4022       | 131.662     |
| C9-H9C-O9   | 2.2966       | 172.134     |
| C8-H8-O5    | 2.5305       | 106.053     |
| C10-H10-O2  | 2.4990       | 116.252     |
| C3-H3-O5    | 2.4941       | 107.232     |
| C3-H3-O8    | 2.5543       | 116.141     |

## SI 2. Hirshfeld Surface and Interactions

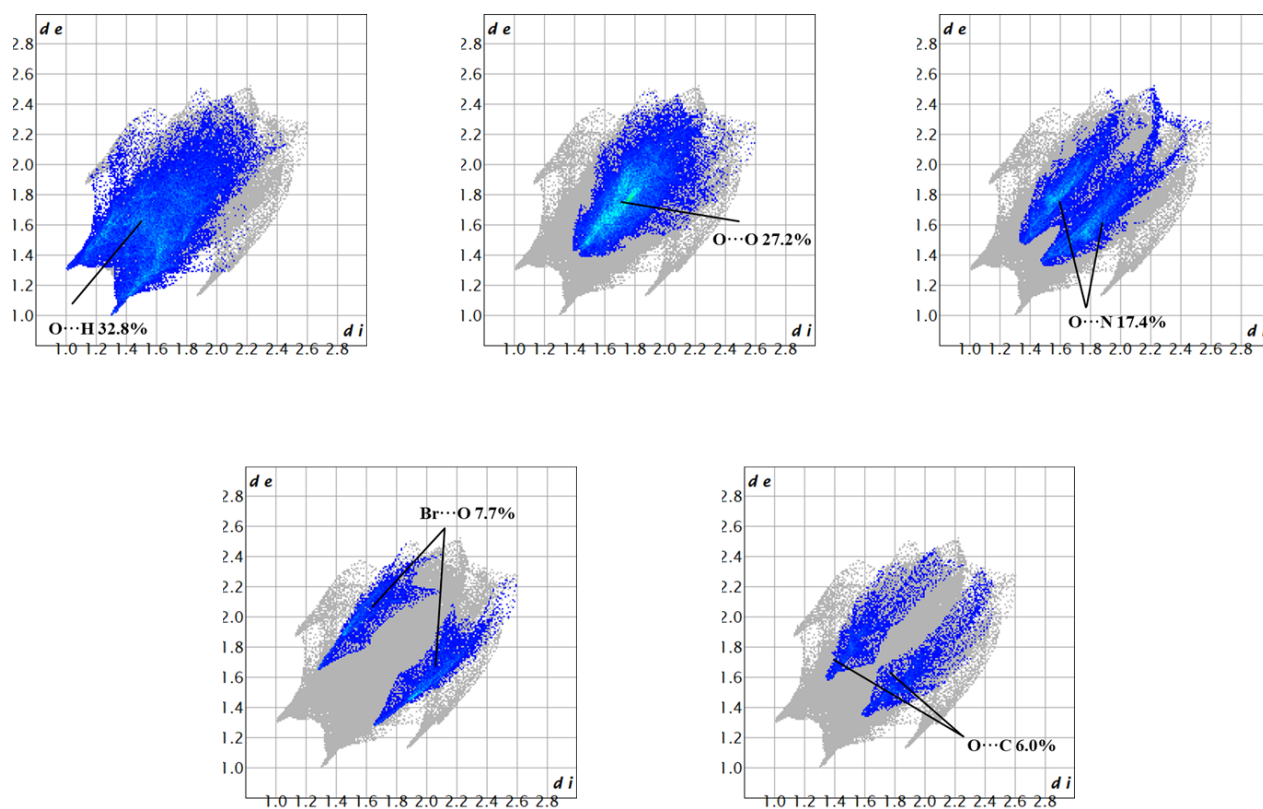

(a)

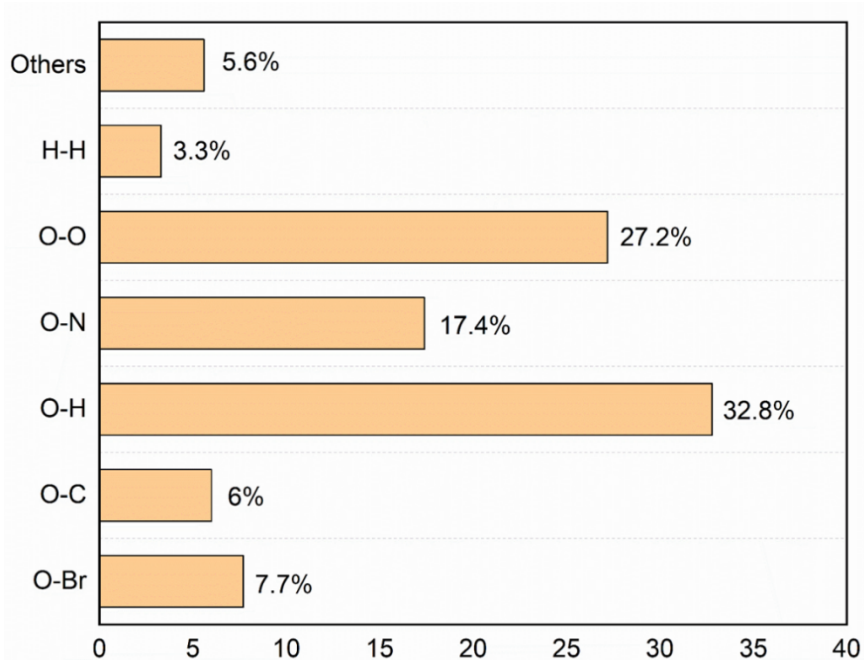

(b)

Figure. S3 Hirshfeld surface and atom contacts of cocrystals: (a) Hirshfeld surface of CL-20/BMDNP

cocrystal, (b) The close contacts percentage contribution to the Hirshfeld surface.

To further explore the cocrystal structure, the 2D fingerprint plots are carried out via Crystal Explorer 3.0<sup>1-2</sup>. As shown in Figure S3, CL-20/BMDNP cocrystal has the O---H, O---O, O---N, O---C, and Br---O contacts. Among them, the proportion of O-H contacts is 32.8%, confirming the presence of hydrogen bonding interactions; O-N and O-C contacts co-occur in 23.4% of the Hirshfeld surface, indicating the presence of NO<sub>2</sub>- $\pi$  interactions. Remarkably, the proportion of O-Br occupies 7.7% of the Hirshfeld surface, suggesting that the weak intermolecular interaction force similar to hydrogen bonding, which is a halogen bond formed by the halogen element Br with O atoms, also plays a role in the process of cocrystal formation.

### SI 3. Detonation property evaluation

The Gaussian 09 software<sup>3-4</sup> was used to optimize the cocrystal structure and the Explo5 program<sup>5</sup> was used to predict the detonation characteristics of the cocrystal molecules such as detonation velocity and detonation pressure.

In this paper, the crystal densities in Crystallographic Information Files (CIFs) files are used, and the solid-phase generation enthalpy  $\Delta H_{f, \text{solid}}$  from Gaussian 09 simulation results is used as the theoretical generation enthalpy, and the Explo5 program is used for the calculation of the detonation properties. Among them, the solid-phase generation enthalpy of cocrystal molecules was calculated by Gaussian 09 through the DFT-B3PW91 method, optimised under the 6-31G (d, p) basis group.

According to Hess's law, the enthalpy of solid-phase formation is represented by the enthalpy of gas-phase formation and the enthalpy of sublimation as shown in Equation 1:

$$\Delta H_{f, \text{solid}} = \Delta H_{f, \text{gas}} - \Delta H_{\text{sub}} \quad (1)$$

where the enthalpy of sublimation can be calculated by the method proposed by Politzer<sup>6</sup>, based on the molecular surface area of the energy-containing compound (A), the electrostatic interaction index ( $\nu\sigma_{\text{tot}}^2$ ) and the correlation coefficient determined by Rice<sup>7</sup>, as shown in Equation 2:

$$\Delta H_{\text{sub}} = 0.000267A^2 + 1.65(\nu\sigma_{\text{tot}}^2)^{0.5} - 2.966078 \quad (2)$$

The gas phase enthalpy of formation ( $\Delta H_{f, \text{gas}}$ ) can be predicted for target compounds based on isobonding reactions. The isobonding reaction profile is shown in Equation 3 and 4. Some of the data described above are presented in the Table 5 and 6.

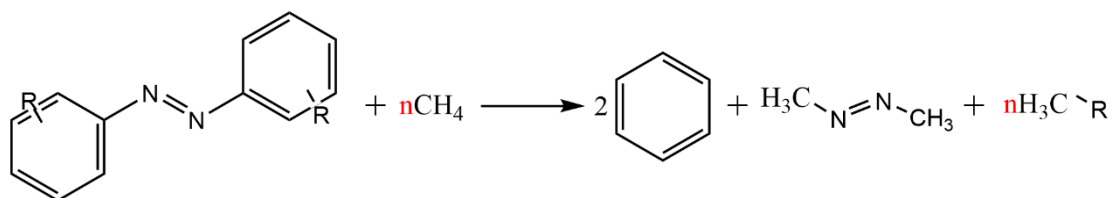

$$\Delta_r H_{298} = \Delta E_0 + \Delta ZPE + \Delta H_T + \Delta(pV) \quad (3)$$

$$\Delta_r H_{298} = \sum \Delta H_{f, \text{gas}, P} + \sum \Delta H_{f, \text{gas}, R} \quad (4)$$

In Equation 3 and 4:  $\Delta E_0$  is the value of the total energy change between the product and the reactant at 0 K;  $\Delta ZPE$  is the value of the zero-point energy change between the product and the reactant;  $\Delta H_T$  is the value of the change of the thermal correction value before and after the reaction; P denotes the product and R denotes the reactant.

**Table 5.** Relevant data results calculated by the Multiwfn programme.

| Item                                                    | Results                           |
|---------------------------------------------------------|-----------------------------------|
| Volume                                                  | 548.98520 Å <sup>3</sup>          |
| Estimated density according to mass and volume<br>(M/V) | 2.0846 g/cm <sup>3</sup>          |
| Overall surface area                                    | 469.98319 Å <sup>2</sup>          |
| Positive surface area                                   | 251.44445 Å <sup>2</sup>          |
| Negative surface area                                   | 218.53873 Å <sup>2</sup>          |
| Overall variance (sigma <sup>2</sup> _tot)              | 174.21158 (kcal/mol) <sup>2</sup> |
| Balance of charges (nu)                                 | 0.12213586                        |
| Product of sigma <sup>2</sup> _tot and nu               | 21.27748 (kcal/mol) <sup>2</sup>  |



**Table 6.** Theoretical calculation of partial data.

| $\rho(\text{g}\cdot\text{cm}^3)$ | A      | $v\sigma_{tot}^2$ | $\Delta H_{f, \text{gas}}(\text{kJ}\cdot\text{mol}^{-1})$ | $\Delta H_{\text{sub}}(\text{kJ}\cdot\text{mol}^{-1})$ | $\Delta H_{f, \text{solid}}(\text{kJ}\cdot\text{mol}^{-1})$ |
|----------------------------------|--------|-------------------|-----------------------------------------------------------|--------------------------------------------------------|-------------------------------------------------------------|
| 2.081                            | 469.98 | 21.27728          | 1126.76578                                                | 69.5535                                                | 1057.76578                                                  |

**Table 7.** Predicted detonation performances of cocrystals, raw materials and references

| Samples   | Density<br>( $\text{g}\cdot\text{cm}^3$ ) | Detonation velocity<br>(m/s) | Detonation pressure<br>(GPa) |
|-----------|-------------------------------------------|------------------------------|------------------------------|
| CL-20     | 2.035                                     | 9792                         | 45.07                        |
| BMDNP     | 2.13                                      | 6647                         | 22.74                        |
| Cocrystal | 2.081                                     | 8847                         | 38.97                        |
| HMX       | 1.900                                     | 9214                         | 38.58                        |
| RDX       | 1.816                                     | 8877                         | 34.94                        |
| CL-20/TNT | 1.846                                     | 8558                         | 32.69                        |

For comparisons, CL-20, BMDNP, HMX, RDX, CL-20/TNT and cocrystal were also calculated by the same method.

#### SI 4. References

- [1] J. J. McKinnon, D. Jayatilaka, M. A. Spackman, Towards quantitative analysis of intermolecular interactions with Hirshfeld surfaces, *Chem. Commun.*, 2007, 37, 3814-3816
- [2] M. A. Spackman, D. Jayatilaka, Hirshfeld surface analysis, *CrystEngComm*, 2009, 11, 19-32.
- [3] Becke, A. D. (1992). Density - functional thermochemistry. I. The effect of the exchange - only gradient correction. *The Journal of chemical physics*, 96(3), 2155-2160.
- [4] Lu T, Chen F. Multiwfn: A multifunctional wavefunction analyzer[J]. *Journal of computational chemistry*, 2012, 33(5): 580-592.
- [5] Sućeska M. EXPLO5—Computer program for calculation of detonation parameters[C]//Proc. of 32nd Int. Annual Conference of ICT, Karlsruhe, Germany. 2001, 110: 1-13.
- [6] Politzer P, Murray J S. Some perspectives on estimating detonation properties of C, H, N, O compounds[J]. *Central European Journal of Energetic Materials*, 2011, 8(3): 209-220.
- [7] Byrd E F C, Rice B M. Improved prediction of heats of formation of energetic materials using quantum mechanical calculations[J]. *The Journal of Physical Chemistry A*, 2006, 110(3): 1005-1013.
